# Supplementary material for: The Down syndrome brain in the presence and absence of fibrillar β-amyloidosis
Source: PubMed Central journal article supplement (PMC5391869; doi:10.1016/j.neurobiolaging.2017.01.009), 2017-05
Supplement: mmc1.pdf [file mmc1.pdf]

### Cross-sectional morphometry studies in Down syndrome

| Study                                              | Participants/<br>demented | Age range<br>(years) | Structural<br>analysis                    | Regions with<br>lower GM in DS                                                                                                       | Regions with<br>increased GM in DS                                                                                                                                           |
|----------------------------------------------------|---------------------------|----------------------|-------------------------------------------|--------------------------------------------------------------------------------------------------------------------------------------|------------------------------------------------------------------------------------------------------------------------------------------------------------------------------|
| <b>Children and adolescents with Down syndrome</b> |                           |                      |                                           |                                                                                                                                      |                                                                                                                                                                              |
| Pinter <i>et al.</i><br>(2001)                     | 16/0 DS<br>15 TDC         | 5–23                 | ROI analysis<br>using manual<br>volumetry | Whole brain,<br>cerebellum                                                                                                           | Parietal lobe, basal<br>ganglia (incl.<br>thalamus)                                                                                                                          |
| Menghini <i>et al.</i><br>(2011)                   | 18/0 DS<br>12 TDC         | 12–19                | VBM using<br>SPM2                         | Whole brain,<br>L posterior<br>cerebellum,<br>R inferior temporal<br>gyrus,<br>fusiform gyrus,<br>R hippocampus                      | L anterior cerebellum,<br>R fusiform gyrus,<br>putamen, caudate,<br>insula, superior<br>frontal gyrus,<br>R superior and middle<br>temporal gyrus,<br>inferior frontal gyrus |
| Smigielska-<br>Kuzia <i>et al.</i><br>(2011)       | 23/0 DS<br>26 TDC         | 2–15                 | ROI analysis<br>using manual<br>volumetry | Frontal lobe,<br>temporal lobe,<br>hippocampus,<br>amygdala                                                                          | None found                                                                                                                                                                   |
| <b>Non-demented adults with Down syndrome</b>      |                           |                      |                                           |                                                                                                                                      |                                                                                                                                                                              |
| Weis <i>et al.</i><br>(1991)                       | 7/0 DS<br>7 TDC           | 30–45                | ROI analysis<br>using manual<br>volumetry | Whole brain,<br>cerebellum                                                                                                           | None found                                                                                                                                                                   |
| Keslak <i>et al.</i><br>(1994)                     | 13/0 DS<br>10 TDC         | 23–51                | ROI analysis<br>using manual<br>volumetry | Frontal cortex,<br>cerebellum,<br>hippocampus,                                                                                       | Parahippocampal<br>gyrus                                                                                                                                                     |
| Raz <i>et al.</i> (1995)                           | 13/0 DS<br>12 TDC         | 22–50                | ROI analysis<br>using manual<br>volumetry | Whole brain,<br>cerebellum,<br>hippocampus                                                                                           | Parahippocampal<br>gyrus                                                                                                                                                     |
| Aylward <i>et al.</i><br>(1997b)                   | 22/0 DS<br>22 TDC         | 25–60                | ROI analysis<br>using manual<br>volumetry | Whole brain                                                                                                                          | Putamen                                                                                                                                                                      |
| Krasuski <i>et al.</i><br>(2002)                   | 34/0 DS<br>33 TDC         | 25–64                | ROI analysis<br>using manual<br>volumetry | Amygdala,<br>hippocampus,<br>posterior<br>parahippocampal<br>gyrus                                                                   | None found                                                                                                                                                                   |
| Teipel <i>et al.</i><br>(2003)                     | 34/0 DS<br>31 TDC         | 25–64                | ROI analysis<br>using manual<br>volumetry | Whole brain,<br>hippocampus                                                                                                          | None found                                                                                                                                                                   |
| White <i>et al.</i><br>(2003)                      | 19/0 DS<br>11 TDC         | 34–56                | VBM using<br>SPM99                        | Whole brain,<br>cerebellum,<br>L medial<br>frontal lobe,<br>R superior/middle<br>temporal lobe,<br>cingulate gyrus,<br>L hippocampus | Some evidence for L<br>parahippocampal<br>gyrus                                                                                                                              |
| Beacher <i>et al.</i><br>(2010)                    | 39/0 DS<br>42 TDC         | 18–66                | ROI analysis<br>using manual<br>volumetry | Whole brain,<br>L frontal lobe,<br>cerebellum                                                                                        | Parietal lobe,<br>putamen, occipital<br>lobe                                                                                                                                 |

*Supplementary Table 1 continued on reverse*

*Supplementary Table 1 continued*

| Study                                                      | Participants/<br>demented | Age range<br>(years) | Structural<br>analysis                    | Regions with<br>lower GM in DS                                  | Regions with<br>increased GM in DS |
|------------------------------------------------------------|---------------------------|----------------------|-------------------------------------------|-----------------------------------------------------------------|------------------------------------|
| <b>Non-demented and demented adults with Down syndrome</b> |                           |                      |                                           |                                                                 |                                    |
| Roth <i>et al.</i><br>(1996)                               | 30/10 DS<br>30 TDC        | 23–60                | Visual scoring<br>for atrophy             | Basal ganglia                                                   | None found                         |
| Frangou <i>et al.</i><br>(1997)                            | 17/4 DS<br>17 TDC         | 30–60                | ROI analysis<br>using manual<br>volumetry | Whole brain,<br>planum temporale                                | None found                         |
| Aylward <i>et al.</i><br>(1997a)                           | 30/5 DS<br>30 TDC         | 25–63                | ROI analysis<br>using manual<br>volumetry | Whole brain,<br>cerebellum                                      | None found                         |
| Pearlson <i>et al.</i><br>(1998)                           | 50/11 DS<br>23 TDC        | Not<br>reported      | ROI analysis<br>using manual<br>volumetry | Whole brain,<br>hippocampus,<br>amygdala                        | None found                         |
| Aylward <i>et al.</i><br>(1999)                            | 25/8 DS<br>25 TDC         | 26–59                | ROI analysis<br>using manual<br>volumetry | Hippocampus,<br>amygdala                                        | None found                         |
| Prasher <i>et al.</i><br>(2003)                            | 24/11 DS<br>0 TDC         | 26–78                | ROI analysis<br>using manual<br>volumetry | Some evidence<br>for temporal lobe                              | None found                         |
| Beacher <i>et al.</i><br>(2009)                            | 58/19 DS<br>0 TDC         | 16–66                | ROI analysis<br>using manual<br>volumetry | Whole brain,<br>hippocampus,<br>R amygdala,<br>caudate, putamen | None found                         |
| Mullins <i>et al.</i><br>(2013)                            | 64/19 DS<br>128 TDC       | Not<br>reported      | ROI analysis<br>using manual<br>volumetry | Whole brain,<br>hippocampus                                     | None found                         |

Supplementary Table 1      An overview of previously published morphometry studies in adults with Down syndrome (DS). DS – participants with DS; TDC – typically developing control participants; GM – grey matter; L – left; R – right; ROI – region-of-interest; VBM – voxel-based-morphometry; SPM99/2 – Statistical Parametric Mapping neuroimaging analysis software, versions 99 and 2, respectively.

## Mean cortical thickness across groups

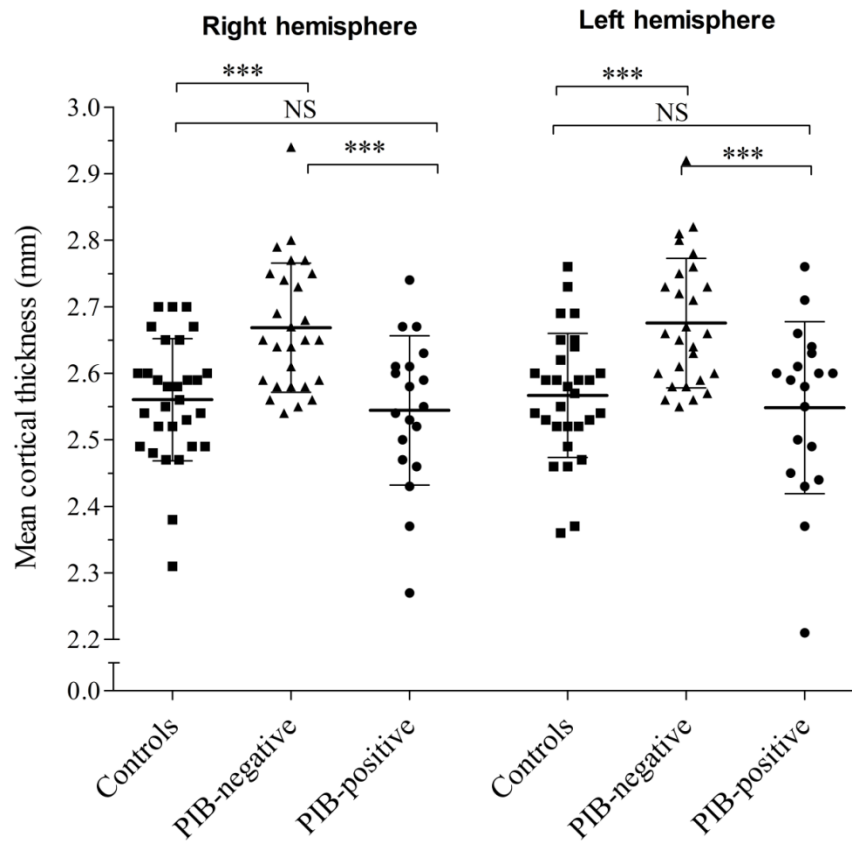

Supplementary Figure 1

The distribution of mean cortical thickness data of the left and right hemispheres in fibrillar  $\beta$ -amyloid negative (PIB-negative) and positive (PIB-positive) individuals with Down syndrome and typically developing controls (Controls). \*\*\* –  $p < 0.001$ ; NS – non-significant, both Independent sample t-tests (two-tailed).

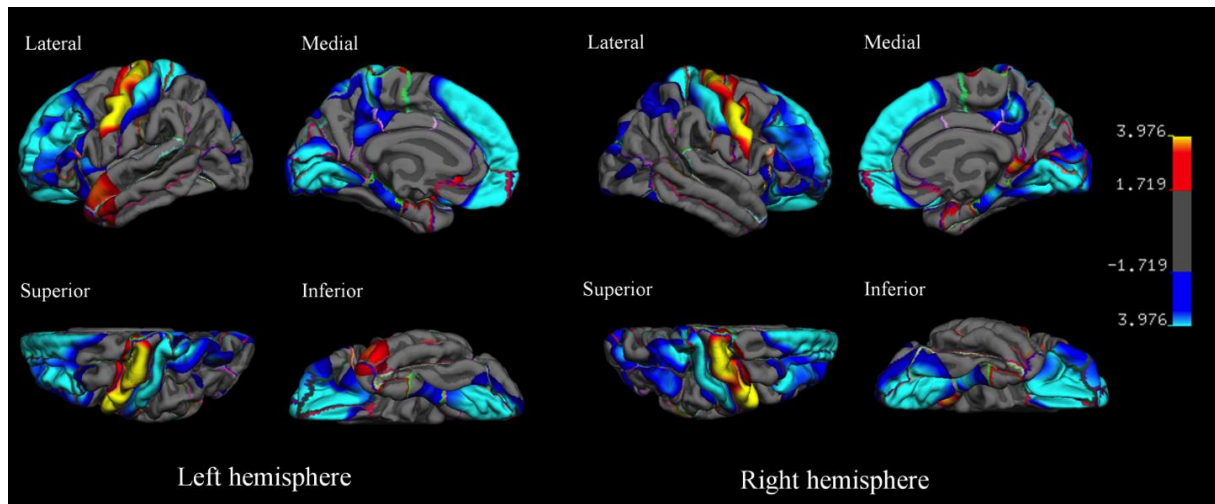

Supplementary Figure 2 The pattern of regional variations in cortical thickness across the hemispheres in the PIB-negative group (n=27) in comparison to control group (n=30), adjusted for differences in age. The colour scale on the right represents the significance of the thickness difference as  $-\log_{10}(\text{p-value})$  with yellow indicating regions of most significant thinner cortex and light blue indicating regions with most significant thicker cortex in the PIB-negative group compared to Controls. The results are false discovery rate corrected at  $p < 0.05$  with mean-adjusted age included in the statistical model as a nuisance covariate.

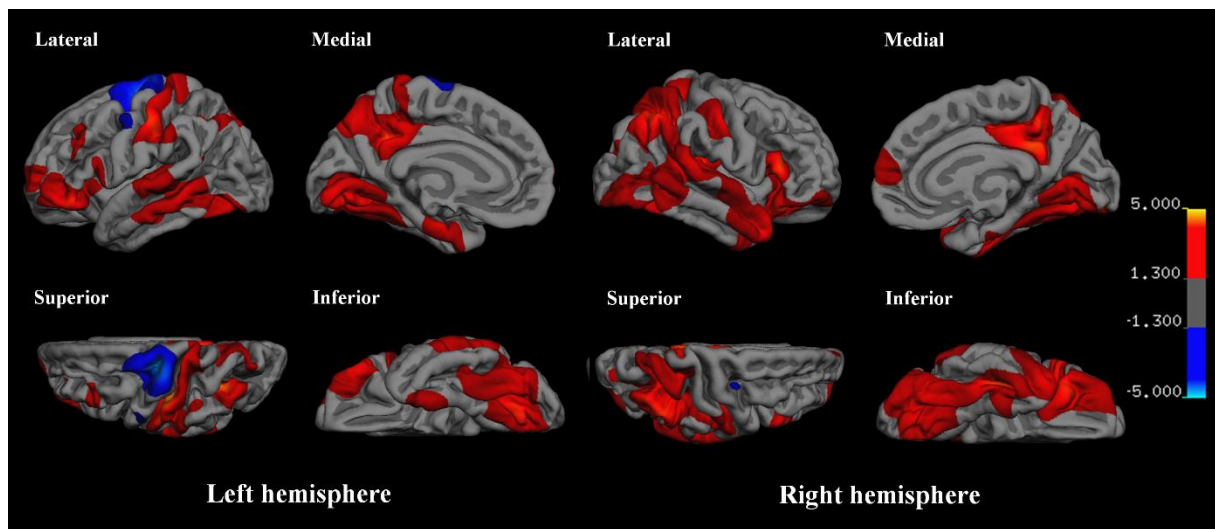

Supplementary Figure 3 The pattern of regional variations in cortical thickness in a subgroup analysis of PIB-negative (n=13) and PIB-positive (n=9) individuals aged between 39 and 48 years, matched for age (Independent sample t-test,  $t(20)=1.481$ ,  $p=0.154$ ). The colour scale on the right represents the significance of the thickness difference as  $-\log_{10}(p\text{-value})$  with yellow indicating regions of most significantly thinner cortex and light blue indicating regions with most significantly thicker cortex in the PIB-positive group compared with PIB-negative group. The results are shown at uncorrected level of  $p<0.05$ .
